# Supplementary material for: The SISAL database: a global resource to document oxygen and carbon isotope records from speleothems
Source: Copernicus journal article supplement (doi:10.5194/essd-2018-17), 2018-04-16
Supplement: Supplementary file 1 [file essd-2018-17-supplement.zip]

## **Supplementary Information: The SISAL database: a global resource to document oxygen and carbon isotope records from speleothems**

Kamolphet Atsawawanunt<sup>1</sup>, Laia Comas-Bru<sup>2</sup>, Sahar Amirnezhad Mozhdehi<sup>2</sup>, Michael Deininger<sup>2,3</sup>, Sandy P. Harrison<sup>1</sup>, Andy Baker<sup>4</sup>, Meighan Boyd<sup>5</sup>, Nikita Kaushal<sup>6</sup>, Syed Masood Ahmed<sup>7</sup>, Yassine Ait Brahim<sup>8</sup>, Monica Arienzo<sup>9</sup>, Petra Bajo<sup>10</sup>, Kerstin Braun<sup>11</sup>, Yuval Burstyn<sup>12</sup>, Sakonvan Chawchai<sup>13</sup>, Wuhui Duan<sup>14</sup>, István Gábor Hatvani<sup>15</sup>, Jun Hu<sup>16</sup>, Zoltán Kern<sup>15</sup>, Inga Labuhn<sup>17</sup>, Matthew Lachniet<sup>18</sup>, Franziska A. Lechleiter<sup>6</sup>, Andrew Lorrey<sup>19</sup>, Carlos Pérez-Mejías<sup>20</sup>, Robyn Pickering<sup>21</sup>, Nick Scroton<sup>22</sup> and SISAL Working Group Members

- 1: Centre for Past Climate Change and School of Archaeology, Geography & Environmental Sciences, Reading University, Whiteknights, Reading, RG6 6AH, UK
- 2: School of Earth Sciences, University College Dublin, Belfield, Dublin 4, Ireland.
- 3: Institute of Geosciences, Johannes-Gutenberg-University Mainz, Johann-Joachim-Becher-Weg 21, 55128 Mainz, Germany
- 4: School of Biological, Earth and Environmental Sciences, University of New South Wales, Kensington 2052, Australia
- 5: Department of Earth Sciences, Royal Holloway University of London, Egham, Surrey TW20 0EX, UK
- 6: Department of Earth Sciences, University of Oxford, South Parks Road, Oxford, OX1 3AN, UK
- 7: National Geophysical Research Institute, Uppal Road, 500 007 Hyderabad, India
- 8: Institute of Global Environmental Change, Xi'an Jiaotong University, Xi'an, Shaanxi, China
- 9: Division of Hydrologic Sciences, Desert Research Institute, 2215 Raggio Parkway, 89512 Reno, NV, USA
- 10: The University of Melbourne, Bouverie Street, 3010 Parkville, Australia
- 11: Institute of Human Origins, Arizona State University, PO Box 874101, 85287 Tempe, Arizona, USA
- 12: Institute of Earth Science/Geology, Hebrew University of Jerusalem, Edmond J. Safra campus, Givat Ram, 91904 Jerusalem, Israel and Geological Survey of Israel, 30 Malkhe Israel, Jerusalem, 95501, Israel
- 13: Dept of Geology, Faculty of Sciences, Chulalongkorn University, 254 Phayathai Rd, Pathum Wan, 10330 Bangkok, Thailand
- 14: Institute of Geology and Geophysics, Chinese Academy of Sciences, University of Chinese Academy of Sciences, No.19 Beitucheng West Road, Chaoyang District, Beijing, China
- 15: Institute for Geological and Geochemical Research, Research Centre for Astronomy and Earth Sciences, Hungarian Academy of Sciences, Budaörsi út 45, 1112 Budapest, Hungary
- 16: Department of Earth Sciences, University of Southern California, 3651 Trousdale Parkway, 90089 Los Angeles, California, USA
- 17: Institute of Geography, University of Bremen, Bremen, Germany
- 18: Dept. of Geoscience, University of Nevada, Box 4010, 89154 Las Vegas, NV, USA
- 19: Climate, Atmosphere and Hazards Centre, National Institute of Water & Atmospheric Research, 41 Market Place, Central Business District, Auckland, New Zealand 1010
- 20: Department of Geoenvironmental Processes and Global Change, Pyrenean Institute of Ecology (IPE-CSIC), Avda. Montañana 1005, 50059 Zaragoza, Spain
- 21: Department of Geological Sciences, Human Evolutionary Research Institute, University of Cape Town, 7701 Rondebosch, Cape Town, South Africa
- 22: Department of Geosciences, University of Massachusetts Amherst, 611 North Pleasant Street, 01003-9297 Amherst, MA, USA



**Table S1:** Definition of pre-defined choice for all fields in the SISAL\_v1 database

| Table name          | Field                       | Lists                                                                                                                                                                                                                                           |
|---------------------|-----------------------------|-------------------------------------------------------------------------------------------------------------------------------------------------------------------------------------------------------------------------------------------------|
| d13C                | iso_std                     | ‘PDB’, ‘Vienna-PDB’                                                                                                                                                                                                                             |
| d18O                | iso_std                     | ‘PDB’, ‘Vienna-PDB’                                                                                                                                                                                                                             |
| dating              | date_type                   | ‘C14’, ‘MC-ICP-MS U/Th’, ‘ICP-MS U/Th Other’, ‘Alpha U/Th’, ‘TIMS’, ‘U/Th unspecified’, ‘Cross-dating’, ‘Multiple methods’, ‘Event; hiatus’, ‘Event; actively forming’, ‘Event; start of laminations’, ‘Event; end of laminations’, ‘unknown’   |
| dating              | material_dated              | ‘calcite’, ‘aragonite’, ‘organic’, ‘other’, ‘unknown’                                                                                                                                                                                           |
| dating              | calib_used                  | ‘INTCAL13 NH’, ‘INTCAL13 SH’, ‘INTCAL13 marine’, ‘INTCAL09’, ‘INTCAL09 marine’, ‘INTCAL04 NH’, ‘INTCAL04 SH’, ‘INTCAL98’, ‘FAIRBANKS09’, ‘not calibrated’                                                                                       |
| dating              | date_used                   | ‘yes’, ‘no’, ‘unknown’                                                                                                                                                                                                                          |
| dating              | decay_constant              | ‘Cheng et al. 2000’, ‘Cheng et al. 2013’, ‘Edwards et al. 1987’, ‘Ivanovich & Harmon 1992’, ‘others’, ‘unknown’                                                                                                                                 |
| entity              | depth_ref                   | ‘from top’, ‘from base’, ‘not applicable’                                                                                                                                                                                                       |
| entity              | speleothem_type             | ‘stalagmite’, ‘composite’, ‘stalactite’, ‘flowstone’, ‘unknown’, ‘other’                                                                                                                                                                        |
| entity              | drip_type                   | ‘seepage flow’, ‘seasonal drip’, ‘fast flow’, ‘mixture’, ‘unknown’                                                                                                                                                                              |
| entity              | d13C                        | ‘yes’, ‘no’, ‘unknown’                                                                                                                                                                                                                          |
| entity              | d18O                        | ‘yes’, ‘no’, ‘unknown’                                                                                                                                                                                                                          |
| entity              | d18O_water_equilibrium      | ‘yes’, ‘no’, ‘unknown’                                                                                                                                                                                                                          |
| entity              | trace_elements              | ‘yes’, ‘no’, ‘unknown’                                                                                                                                                                                                                          |
| entity              | organics                    | ‘yes’, ‘no’, ‘unknown’                                                                                                                                                                                                                          |
| entity              | fluid_inclusions            | ‘yes’, ‘no’, ‘unknown’                                                                                                                                                                                                                          |
| entity              | mineralogy_petrology_fabric | ‘yes’, ‘no’, ‘unknown’                                                                                                                                                                                                                          |
| entity              | clumped_isotopes            | ‘yes’, ‘no’, ‘unknown’                                                                                                                                                                                                                          |
| entity              | noble_gas_temperatures      | ‘yes’, ‘no’, ‘unknown’                                                                                                                                                                                                                          |
| entity              | C14                         | ‘yes’, ‘no’, ‘unknown’                                                                                                                                                                                                                          |
| entity              | ODL                         | ‘yes’, ‘no’, ‘unknown’                                                                                                                                                                                                                          |
| entity              | Mg_Ca                       | ‘yes’, ‘no’, ‘unknown’                                                                                                                                                                                                                          |
| gap                 | gap                         | ‘G’                                                                                                                                                                                                                                             |
| hiatus              | hiatus                      | ‘H’                                                                                                                                                                                                                                             |
| original_chronology | age_model_type              | ‘linear’, ‘linear between dates’, ‘polynomial fit’, ‘polynomial fit omitting outliers’, ‘Bayesian’, ‘Bayesian Bacon’, ‘Bayesian Bchron’, ‘StalAge’, ‘StalAge and other’, ‘Clam’, ‘COPRA’, ‘OxCal’, ‘combination of methods’, ‘unknown’, ‘other’ |
| original_chronology | ann_lam_check               | ‘14C peak’, ‘14C slope’, ‘U/Th cycle’, ‘trace element cycle’, ‘assumed’, ‘not applicable’, ‘unknown’                                                                                                                                            |
| original_chronology | dep_rate_check              | ‘yes’, ‘no’, ‘assumed’, ‘not applicable’, ‘unknown’                                                                                                                                                                                             |
| sample              | mineralogy                  | ‘calcite’, ‘secondary calcite’, ‘aragonite’, ‘vaterite’, ‘mixed’, ‘unknown’                                                                                                                                                                     |
| sample              | composite                   | ‘yes’, ‘no’, ‘unknown’                                                                                                                                                                                                                          |

|        |            |                                                                                                                                                                                                                                     |
|--------|------------|-------------------------------------------------------------------------------------------------------------------------------------------------------------------------------------------------------------------------------------|
| sample | arag_corr  | 'yes', 'no', 'not applicable', 'unknown'                                                                                                                                                                                            |
| site   | geology    | 'limestone', 'dolomite', 'gypsum', 'magmatic', 'marble', 'granite', 'mixed', 'other', 'unknown'                                                                                                                                     |
| site   | rock_age   | 'Holocene', 'Pleistocene', 'Pliocene', 'Miocene', 'Oligocene', 'Eocene', 'Palaeocene', 'Cretaceous', 'Jurassic', 'Triassic', 'Permian', 'Carboniferous', 'Devonian', 'Silurian', 'Ordovician', 'Cambrian', 'Precambrian', 'unknown' |
| site   | monitoring | 'yes', 'no', 'unknown'                                                                                                                                                                                                              |

**Table S2:** Characteristics of the site table

| Field label | Definition                                                                                                   | Format  | Constraints                    |
|-------------|--------------------------------------------------------------------------------------------------------------|---------|--------------------------------|
| site_id     | Unique identifier for each site, where a site is defined as a cave or cave system                            | Numeric | Positive integer               |
| site_name   | Site name as given by original authors or as defined by us where there was no unique name given to the site  | Text    | None                           |
| latitude    | Latitude of the cave site, given in decimal degrees, where N is positive and S is negative                   | Numeric | None                           |
| longitude   | Longitude of the cave site, given in decimal degrees, E is positive and W is negative                        | Numeric | None                           |
| elevation   | Elevation of the cave, in meters above sea level (where negative values indicate elevations below sea level) | Numeric | None                           |
| geology     | Description of the rock type                                                                                 | Text    | selected from pre-defined list |
| rock_age    | Description of age of the rock                                                                               | Text    | selected from pre-defined list |
| monitoring  | Indication of whether long-term monitoring of cave conditions have been carried out                          | Text    | selected from pre-defined list |

**Table S3:** Characteristics of the entity table

| Field                       | Definition                                                                                                               | Format  | Constraints                    |
|-----------------------------|--------------------------------------------------------------------------------------------------------------------------|---------|--------------------------------|
| site_id                     | Refers to the unique identifier for each site (as given in site table)                                                   | Numeric | Positive integer               |
| entity_id                   | Unique identifier for each entity, where an entity is defined as a speleothem or a speleothem composite                  | Numeric | Positive integer               |
| entity_name                 | Entity (speleothem) name as given by the author                                                                          | Text    | None                           |
| depth_ref                   | Indication of whether the reference point is the top or base of the speleothem                                           | Text    | selected from pre-defined list |
| cover_thickness             | Thickness of overlying bedrock above the speleothem (m)                                                                  | Numeric | Positive decimal               |
| distance_entrance           | Distance of the speleothem from the cave entrance (m)                                                                    | Numeric | Positive decimal               |
| speleothem_type             | Description of the speleothem type                                                                                       | Text    | selected from pre-defined list |
| drip_type                   | Description of the drip type                                                                                             | Text    | selected from pre-defined list |
| d13C                        | Indication of whether $\delta^{13}\text{C}$ measurements have been made of the speleothem                                | Text    | selected from pre-defined list |
| d18O                        | Indication of whether $\delta^{18}\text{O}$ measurements have been measured                                              | Text    | selected from pre-defined list |
| d18O_water_equilibrium      | Indication of whether studies assessing if the speleothem is precipitating in equilibrium with dripwaters have been done | Text    | selected from pre-defined list |
| trace_elements              | Indication of whether trace elements have been measured                                                                  | Text    | selected from pre-defined list |
| organics                    | Indication of whether organics have been measured                                                                        | Text    | selected from pre-defined list |
| fluid_inclusions            | Indication of whether fluid inclusions have been measured                                                                | Text    | selected from pre-defined list |
| mineralogy_petrology_fabric | Indication of whether fabric measurements have been made                                                                 | Text    | selected from pre-defined list |
| clumped_isotopes            | Indication of whether clumped isotopes have been measured                                                                | Text    | selected from pre-defined list |
| noble_gas_temperatures      | Indication of whether noble gases have been measured                                                                     | Text    | selected from pre-defined list |
| C14                         | Indication of whether $^{14}\text{C}$ measurements have been made                                                        | Text    | selected from pre-defined list |
| ODL                         | Indication of whether the optical density of luminosity measurements have been made                                      | Text    | selected from pre-defined list |
| Mg_Ca                       | Indication of whether the Mg/Ca ratio measurements have been made                                                        | Text    | selected from pre-defined list |
| contact                     | Name of the person who entered                                                                                           | Text    | None                           |

|              |                                                                                                        |      |      |
|--------------|--------------------------------------------------------------------------------------------------------|------|------|
|              | the data into the workbook                                                                             |      |      |
| data_doi_url | Digital Object Identifier (DOI) of the data or URL of the webpage from which the data can be obtained. | Text | None |

**Table S4:** Characteristics of the sample table

| <b>Field</b>     | <b>Description</b>                                                                      | <b>Format</b> | <b>Constraints</b>             |
|------------------|-----------------------------------------------------------------------------------------|---------------|--------------------------------|
| entity_id        | Refers to the unique identifier for each entity (as given in entity table)              | Numeric       | Positive integer               |
| <u>sample_id</u> | Unique identifier for the sample                                                        | Numeric       | Positive integer               |
| sample_thickness | Thickness of the sample analysed (mm)                                                   | Numeric       | Positive decimal               |
| depth_sample     | Distance in mm from a reference point                                                   | Numeric       | Positive decimal               |
| mineralogy       | Description of the mineralogy of the sample                                             | Text          | selected from pre-defined list |
| arag_corr        | Indication of whether the isotope measurements have been corrected in aragonite samples | Text          | selected from pre-defined list |

**Table S5:** Characteristics of the dating information table

| Field                           | Description                                                                                 | Format  | Constraints                    |
|---------------------------------|---------------------------------------------------------------------------------------------|---------|--------------------------------|
| dating_id                       | Unique identifier for each date                                                             | Numeric | Positive integer               |
| entity_id                       | Refers to the unique identifier for each entity (as given in entity table)                  | Numeric | Positive integer               |
| date_type                       | Description of the dating method used                                                       | Text    | selected from pre-defined list |
| depth_dating                    | Distance in mm from a reference point                                                       | Numeric | Positive decimal               |
| dating_thickness                | Thickness of dated sample in mm                                                             | Numeric | Positive decimal               |
| lab_num                         | The laboratory number of the dated sample                                                   | Text    | None                           |
| material_dated                  | Mineralogy of the dated sample                                                              | Text    | selected from pre-defined list |
| min_weight                      | Minimum weight of the dated sample in mg                                                    | Numeric | Positive decimal               |
| max_weight                      | Maximum weight of the dated sample in mg                                                    | Numeric | Positive decimal               |
| uncorr_age                      | Uncorrected age of the dated sample in years                                                | Numeric | None                           |
| uncorr_age_uncert_pos           | Positive uncertainty of the uncorrected age of the dated sample in years                    | Numeric | Positive decimal               |
| uncorr_age_uncert_neg           | Negative uncertainty of the uncorrected age of the dated sample in years                    | Numeric | Positive decimal               |
| 14C_correction                  | Percentage dead carbon present in dated sample                                              | Numeric | Positive decimal               |
| calib_used                      | Calibration method used to convert C <sup>14</sup> dates to calendar years                  | Text    | selected from pre-defined list |
| date_used                       | Indication of whether the date is used in the original age model                            | Text    | selected from pre-defined list |
| 238U_content                    | <sup>238</sup> U content of the dated sample in ppb                                         | Numeric | None                           |
| 238U_uncertainty                | <sup>238</sup> U 2-sigma uncertainty of dated sample in ppb                                 | Numeric | None                           |
| 232Th_content                   | <sup>232</sup> Th content of the dated sample in ppt                                        | Numeric | None                           |
| 232Th_uncertainty               | <sup>232</sup> Th 2-sigma uncertainty of the dated sample in ppt                            | Numeric | None                           |
| 230Th_content                   | <sup>230</sup> Th content of the dated sample in ppt                                        | Numeric | None                           |
| 230Th_uncertainty               | <sup>230</sup> Th 2-sigma uncertainty of the dated sample in ppt                            | Numeric | None                           |
| 230Th_232Th_ratio               | <sup>230</sup> Th/ <sup>232</sup> Th activity ratio of the dated sample                     | Numeric | None                           |
| 230Th_232Th_ratio_uncertainty   | <sup>230</sup> Th/ <sup>232</sup> Th activity ratio 2-sigma uncertainty of the dated sample | Numeric | None                           |
| 230Th_238U_activity             | <sup>230</sup> Th/ <sup>238</sup> U activity ratio of the dated sample                      | Numeric | None                           |
| 230Th_238U_activity_uncertainty | <sup>230</sup> Th/ <sup>238</sup> U activity ratio 2-sigma uncertainty of the dated sample  | Numeric | None                           |
| 234U_238U_activity              | <sup>234</sup> U/ <sup>238</sup> U activity ratio of the dated sample                       | Numeric | None                           |
| 234U_238U_activity_u            | <sup>234</sup> U/ <sup>238</sup> U activity ratio 2-sigma                                   | Numeric | None                           |

|                                   |                                                                                                  |         |                                |
|-----------------------------------|--------------------------------------------------------------------------------------------------|---------|--------------------------------|
| ncertainty                        | uncertainty of the dated sample                                                                  |         |                                |
| ini_230Th_232Th_ratio             | Initial $^{230}\text{Th}/^{232}\text{Th}$ activity ratio for the detrital correction             | Numeric | None                           |
| ini_230Th_232Th_ratio_uncertainty | Initial $^{230}\text{Th}/^{232}\text{Th}$ activity ratio uncertainty for the detrital correction | Numeric | None                           |
| decay_constant                    | Description of the half-life used for $^{230}\text{Th}$ and $^{234}\text{U}$ for U/Th samples    | Text    | selected from pre-defined list |
| corr_age                          | Corrected age of the dated sample in years                                                       | Numeric | None                           |
| corr_age_uncert_pos               | Positive uncertainty of corrected age of the dated sample in years                               | Numeric | Positive decimal               |
| corr_age_uncert_neg               | Negative uncertainty of corrected age of the dated sample in years                               | Numeric | Positive decimal               |

**Table S6:** Characteristics of the lamina dating table

| Field              | Description                                                                | Format  | Constraints      |
|--------------------|----------------------------------------------------------------------------|---------|------------------|
| dating_lamina_id   | Unique identifier for each lamina                                          | Numeric | Positive integer |
| entity_id          | Refers to the unique identifier for each entity (as given in entity table) | Numeric | Positive integer |
| depth_lam          | Depth of the midpoint of the lamina in mm from a reference point           | Numeric | Positive integer |
| lam_thickness      | Thickness in mm of the sample dated                                        | Numeric | Positive decimal |
| lam_age            | Age in years of individual lamina                                          | Numeric | None             |
| lam_age_uncert_pos | Positive counting uncertainty of individual lamina in years                | Numeric | Positive decimal |
| lam_age_uncert_neg | Negative counting uncertainty of individual lamina in years                | Numeric | Positive decimal |

**Table S7:** Characteristics of the hiatus place mark information table

| Field     | Description                                                                | Format  | Constraints                    |
|-----------|----------------------------------------------------------------------------|---------|--------------------------------|
| sample_id | Refers to the unique identifier for each sample (as given in sample table) | Numeric | Positive integer               |
| hiatus    | Indication of an hiatus                                                    | Text    | selected from pre-defined list |

**Table S8:** Characteristics of the gap place mark information table

| Field     | Description                                                               | Format  | Constraints                    |
|-----------|---------------------------------------------------------------------------|---------|--------------------------------|
| sample_id | Refers to the unique identifier for the sample (as given in sample table) | Numeric | Positive integer               |
| gap       | Indication of a gap                                                       | Text    | selected from pre-defined list |



**Table S9:** Characteristics of the original chronology information table

| Field                 | Description                                                                                                             | Format  | Constraints                    |
|-----------------------|-------------------------------------------------------------------------------------------------------------------------|---------|--------------------------------|
| sample_id             | Refers to the unique identifier for the sample (as given in sample table)                                               | Numeric | Positive integer               |
| interp_age            | Calendar age of the sample in years                                                                                     | Numeric | Positive decimal               |
| interp_age_uncert_pos | Positive uncertainty on the age of the sample in years                                                                  | Numeric | Positive decimal               |
| interp_age_uncert_neg | Negative uncertainty on the age of the sample in years                                                                  | Numeric | Positive decimal               |
| age_model_type        | Description of the age model used in the original publication                                                           | Text    | selected from pre-defined list |
| ann_lam_check         | Indication that verification that laminae are annual, in cases where lamina counting is used to construct the age model | Text    | selected from pre-defined list |
| dep_rate_check        | Indication that verification of the deposition rate has been made                                                       | Text    | selected from pre-defined list |

**Table S10:** Characteristics of the carbon isotope data table

| Field            | Description                                                               | Format  | Constraints                    |
|------------------|---------------------------------------------------------------------------|---------|--------------------------------|
| sample_id        | Refers to the unique identifier for the sample (as given in sample table) | Numeric | Positive integer               |
| d13C_measurement | Original $\delta^{13}\text{C}$ measurement                                | Numeric | None                           |
| d13C_precision   | Laboratory precision on the $\delta^{13}\text{C}$ measurement             | Numeric | None                           |
| iso_std          | Description of isotopic standard used                                     | Text    | selected from pre-defined list |

**Table S11:** Characteristics of the oxygen isotope data table

| Field            | Description                                                               | Format  | Constraints                    |
|------------------|---------------------------------------------------------------------------|---------|--------------------------------|
| sample_id        | Refers to the unique identifier for the sample (as given in sample table) | Numeric | Positive integer               |
| d18O_measurement | Original $\delta^{18}\text{O}$ measurement                                | Numeric | None                           |
| d18O_precision   | Laboratory precision on the $\delta^{18}\text{O}$ measurement             | Numeric | None                           |
| iso_std          | Description of isotopic standard used                                     | Text    | selected from pre-defined list |

**Table S12:** Characteristics of the publication information table

| Field           | Description                                    | Type    | Constraints      |
|-----------------|------------------------------------------------|---------|------------------|
| ref_id          | Unique identifier for the reference            | Numeric | Positive integer |
| Citation        | Full citation for the original publication     | Text    | None             |
| publication_DOI | Digital Object Identifier (DOI) of publication | Text    | None             |

**Table S13:** Characteristics of the link entity and publication information table

| Field     | Description                                                                                         | Format  | Constraints      |
|-----------|-----------------------------------------------------------------------------------------------------|---------|------------------|
| entity_id | Refers to the unique identifier for the entity (as given in entity table)                           | Numeric | Positive integer |
| ref_id    | Refers to the unique identifier for the publication (as given in the publication information table) | Numeric | Positive integer |

**Table S14:** Characteristics of the link composite and entity table

| Field               | Description                                                                                        | Format  | Constraints      |
|---------------------|----------------------------------------------------------------------------------------------------|---------|------------------|
| composite_entity_id | Refers to the unique identifier for a composite entity (as given in entity table)                  | Numeric | Positive integer |
| single_entity_id    | Refers to the unique identifier for each single entity in the composite (as given in entity table) | Numeric | Positive integer |

**Table 15:** Characteristics of the notes table

| Field   | Description                                                            | Format  | Constraints      |
|---------|------------------------------------------------------------------------|---------|------------------|
| site_id | Refers to the unique identifier for each site (as given in site table) | Numeric | Positive integer |
| Notes   | Notes and additional information about the site                        | Text    | None             |
